# Supplementary material for: The Notch ligand DNER regulates macrophage IFNγ release in chronic obstructive pulmonary disease
Source: PubMed Central journal article supplement — eBioMedicine. 2019 May 4;43:562–75. doi: 10.1016/j.ebiom.2019.03.054 (PMC6562022; doi:10.1016/j.ebiom.2019.03.054), 2019-05-04
Supplement: mmc3.pdf [file mmc3.pdf]

# Supplementary Figure 1

**a**

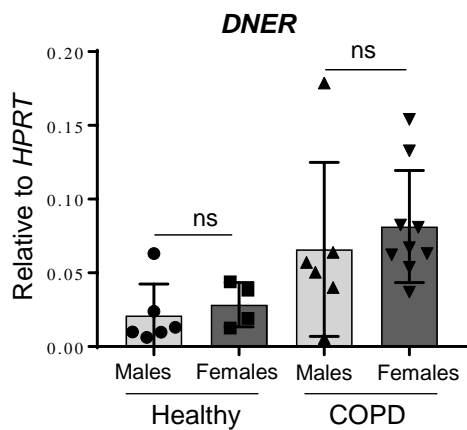

**b**

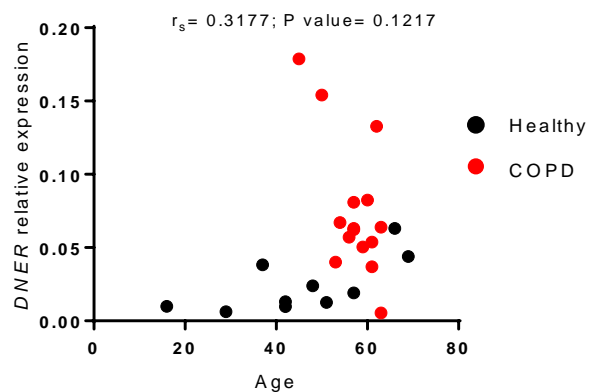

**c**

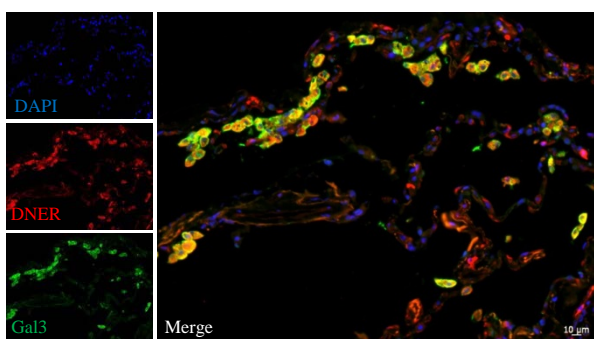

**d**

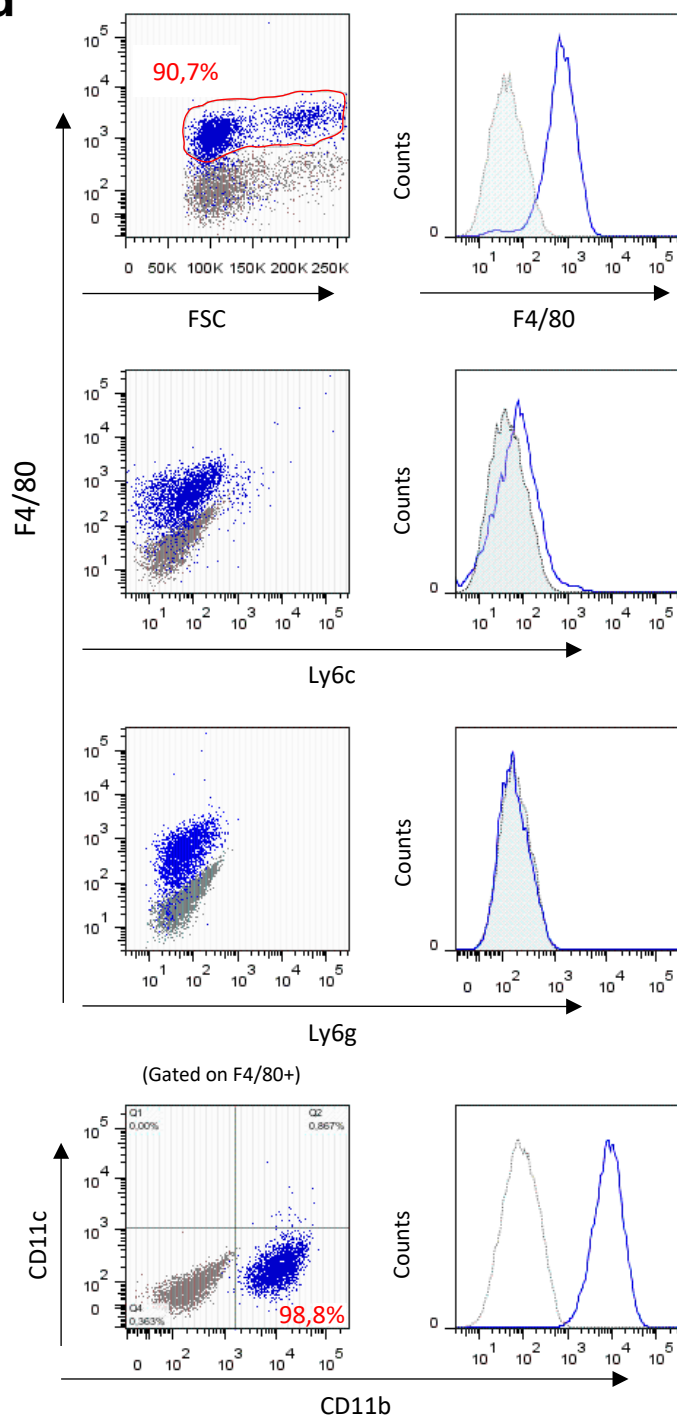

**e**

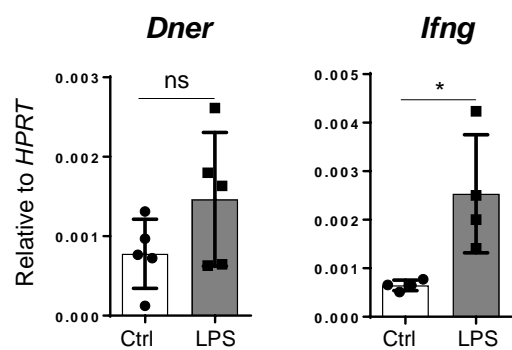

## Supplementary Figure 2

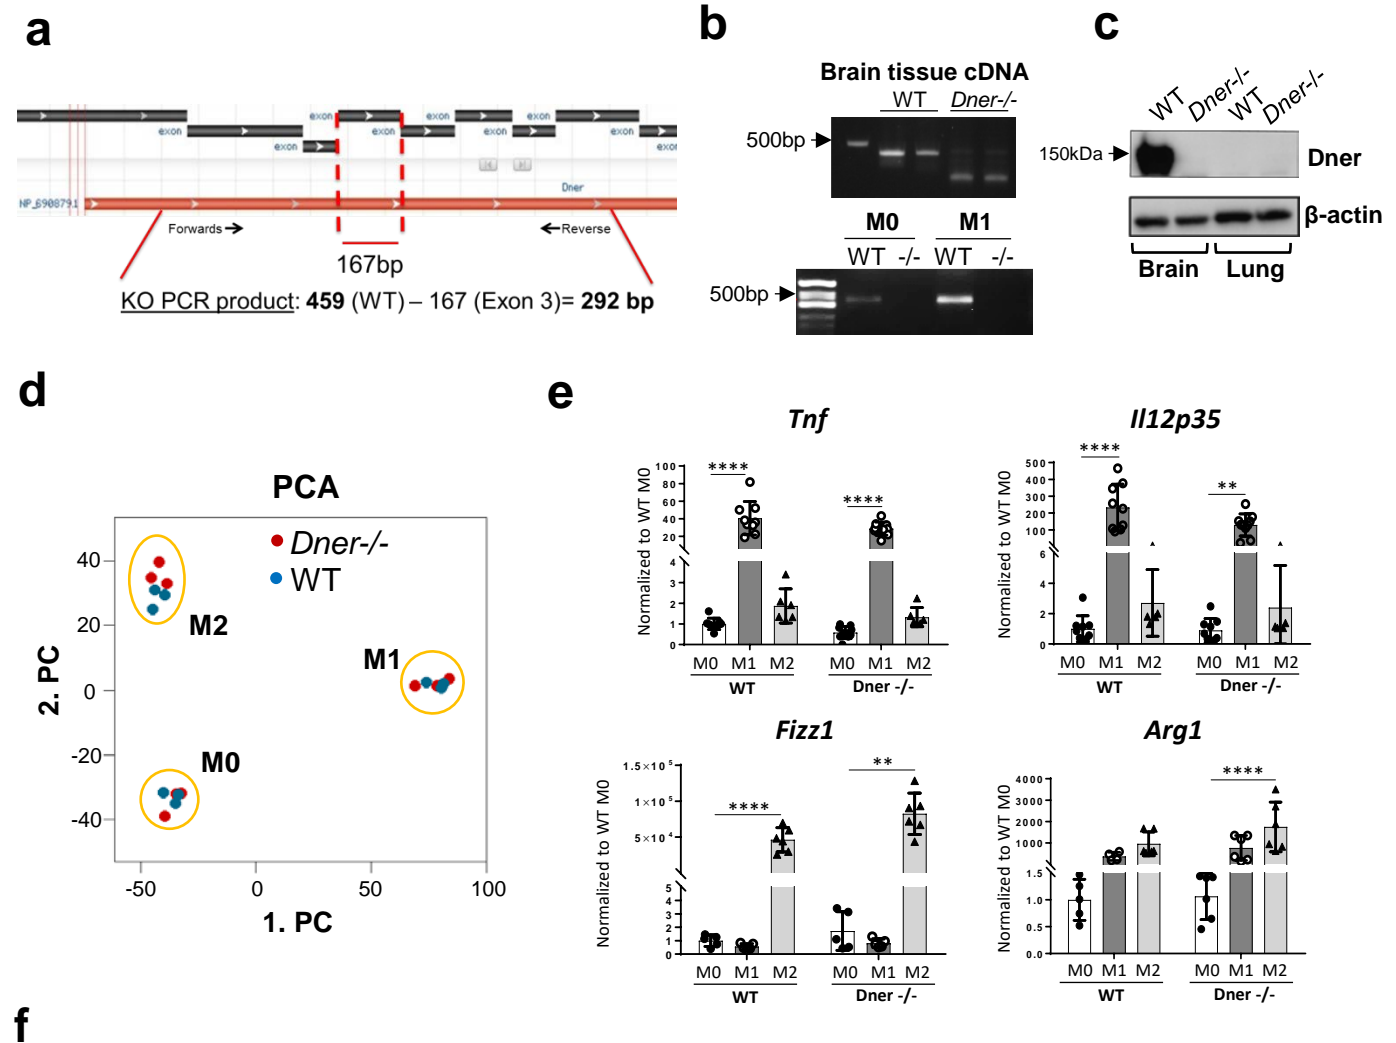

**f**

### Enriched genes in IFN $\gamma$ signalling dataset (from Fig 2F)

| GENE SYMBOL | RANK METRIC SCORE | RUNNING ES  | CORE ENRICHMENT |
|-------------|-------------------|-------------|-----------------|
| IFNGR1      | 0,555793166       | 0,016395938 | Yes             |
| SUMO1       | 0,555555582       | 0,06843433  | Yes             |
| FCGR1A      | 0,548780501       | 0,11730901  | Yes             |
| OAS2        | 0,476190478       | 0,14225388  | Yes             |
| PTAFR       | 0,454545468       | 0,17979813  | Yes             |
| PTPN1       | 0,384615391       | 0,18147604  | Yes             |
| GBP5        | 0,33427763        | 0,18348804  | Yes             |
| OAS1        | 0,317919075       | 0,20190263  | Yes             |
| PRKCD       | 0,306122452       | 0,22340244  | Yes             |
| JAK2        | 0,294117659       | 0,24346457  | Yes             |
| SOCS3       | 0,292035401       | 0,2672922   | Yes             |
| IFNGR2      | 0,276280522       | 0,28188163  | Yes             |
| VCAM1       | 0,255033553       | 0,28695264  | Yes             |

# Supplementary Figure 3

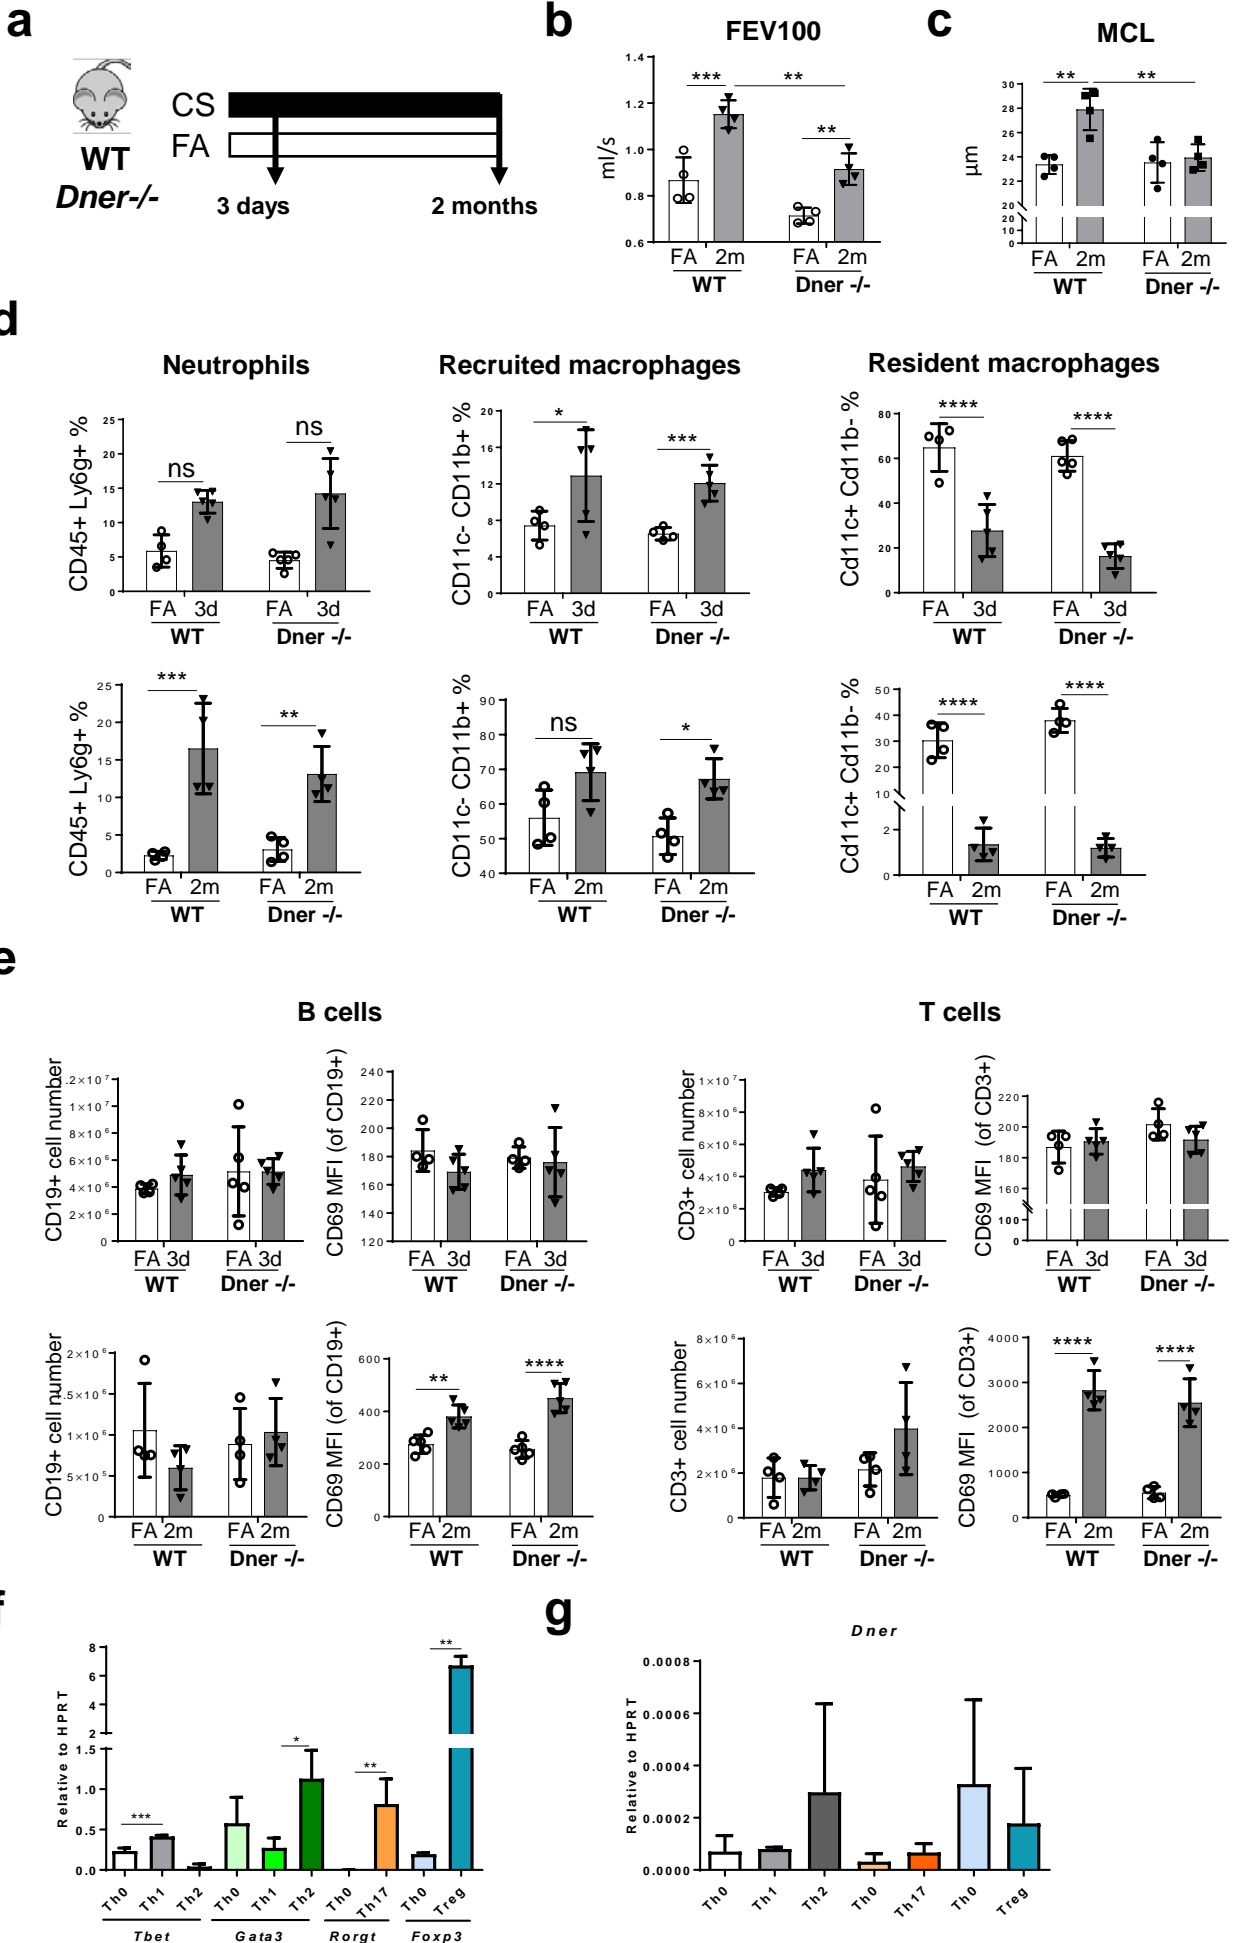

# Supplementary Figure 4

**a**

Enriched genes of Notch1 pathway in WT M1 (Fig. 4e)

| GENE SYMBOL | RANK METRIC SCORE | RUNNING ES | CORE ENRICHMENT |
|-------------|-------------------|------------|-----------------|
| HDAC3       | 1.296296239       | 0.1251865  | Yes             |
| CREBBP      | 0.814317822       | 0.19795468 | Yes             |
| HIF1A       | 0.518518507       | 0.20764284 | Yes             |
| null        | 0.483870953       | 0.24362169 | Yes             |
| HDAC2       | 0.47356829        | 0.28676453 | Yes             |
| TLE4        | 0.434964508       | 0.3138684  | Yes             |
| MYC         | 0.333333343       | 0.2899674  | Yes             |
| NCOR1       | 0.32764855        | 0.3188046  | Yes             |
| TLE2        | 0.3125            | 0.33849412 | Yes             |
| SNW1        | 0.263157904       | 0.32508263 | Yes             |
| HDAC1       | 0.257731944       | 0.3445112  | Yes             |
| HDAC10      | 0.2360515         | 0.3449183  | Yes             |
| TBL1X       | 0.217391297       | 0.3469396  | Yes             |

**b**

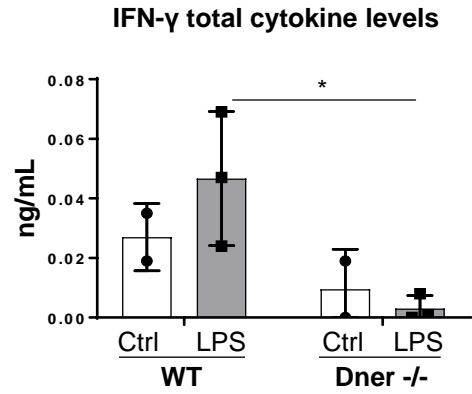

**c**

Enriched genes of NF $\kappa$ B pathway in WT M1 (Fig. 5c)

| GENE SYMBOL | RANK METRIC SCORE | RUNNING ES | CORE ENRICHMENT |
|-------------|-------------------|------------|-----------------|
| HDAC3       | 1.296296239       | 0.20311034 | Yes             |
| FOXP3       | 0.555555582       | 0.2531114  | Yes             |
| RELA        | 0.543243885       | 0.33511746 | Yes             |
| HDAC2       | 0.47356829        | 0.38970152 | Yes             |
| RPS3        | 0.428571433       | 0.43746465 | Yes             |
| COMMD7      | 0.373134315       | 0.46795464 | Yes             |
| ANXA4       | 0.263157904       | 0.43196097 | Yes             |
| HDAC1       | 0.257731944       | 0.4682062  | Yes             |
| FAF1        | 0.209026173       | 0.4539978  | Yes             |
| PPARD       | 0.196257785       | 0.47010383 | Yes             |
| TAF4B       | 0.175315574       | 0.47596845 | Yes             |

**d**

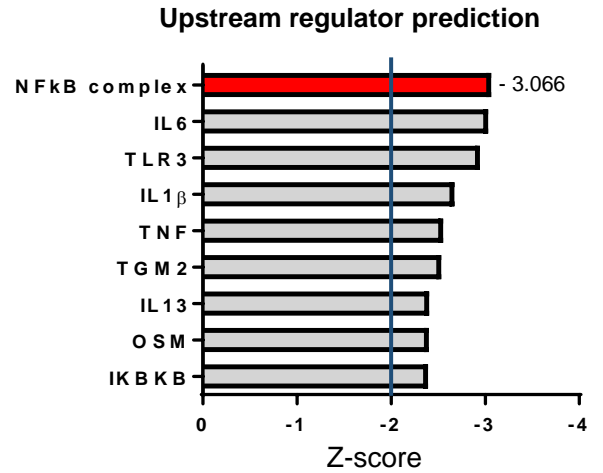

**Supplementary Fig. 1.** DNER expression in human lung and murine bone marrow derived dendritic cells. **(a)** Lung *DNER* mRNA levels in males versus females subjects used in Fig. 1a. One-way ANOVA. **(b)** Correlation between age and *DNER* expression in human samples used in Fig. 1a. Spearman test. **(c)** Representative picture of immunofluorescence staining of DNER and Galectin 3 in lung tissue from an additional COPD patient. **(d)** BMDM characterization by FACS analysis with markers for macrophages (F4/80, CD11b), DC (Ly6c, CD11c) and neutrophils (Ly6g). 1 experiment, *n*=1. **(e)** *Dner* and *Ifng* mRNA abundance in 24h LPS (1µg/ml) treated murine bone marrow derived dendritic cells isolated from WT mice. 1 experiment, *n*=5. Unpaired t-test, \**p*=0.0213. Data shown mean values ± SD.

**Supplementary Fig. 2.** Efficiency of *Dner* deletion in C57BL/6 mice and cellular phenotype of *Dner*<sup>-/-</sup> BMDM. **(a)** Schematic representation of *Dner* gene deletion strategy in *Dner* deficient mice. **(b)** *Dner* mRNA abundance in brain tissue and untreated or M1 (LPS 1µg/ml + IFNγ) BMDM from WT and *Dner* deficient mice quantified by end point PCR. **(c)** Protein levels of *Dner* in brain and lung tissue from WT and *Dner* deficient mice. **(d)** Principal component analysis of *Dner*<sup>-/-</sup> vs. WT BMDM microarray data. **(e)** mRNA levels of M1 (*Tnf*, *Il-12a*) and M2 (*Arg1*, *Fizz1*) markers in WT and *Dner* deficient BMDM. Two-way ANOVA, Tukey's multiple comparisons test, \*\**p*<0.01, \*\*\*\**p*<0.0001. Data shown mean values ± SD. **(f)** List of genes enriched in WT M1 from the IFNγ signaling dataset of the GSEA analysis shown in Fig. 2f.

**Supplementary Fig. 3.** The pathophysiological and immunophenotypic analysis of *Dner* deficient mice after CS exposure. **(a)** Schematic representation of experimental design. **(b)** Forced expiratory volume after 100ms of FA and 2 months CS exposed *Dner* deficient and WT mice. **(c)** Mean chord length measurement of lung tissue sections from same samples as in b. **(d)** Percentages of innate immune cell populations in whole lung from FA, 3 days and 2 month CS-exposed WT and *Dner* deficient mice analyzed by flow cytometry. **(e)** Cell numbers and MFI values of adaptive immune cell populations in whole lung from samples shown in e. **(f)** mRNA levels of positive markers for *in vitro* differentiated T cell subpopulations: Th1 (*Tbet*), Th2 (*Gata3*), Th17 (*Rorgt*) and Treg (*Foxp3*) (see more details in materials and methods). *n*=2/3, 1 experiment. **(g)** *Dner* expression in T cell subpopulations from f. Two-way ANOVA, Tukey's multiple comparisons test, \**p*<0.05, \*\**p*<0.01, \*\*\**p*<0.001, \*\*\*\**p*<0.0001. (b-e). One-way ANOVA, Tukey's multiple comparisons test, Th1\*\*\**p*-value=0.0008, Th2 \**p*-value=0.0231, Th17\*\* *p*-value=0.0019, Treg\*\* *p*-value=0.0048 (f-g). Data shown mean values ± SD.

**Supplementary Fig. 4.** Gene datasets of enriched Notch1 and NFκB signalling in M1 WT BMDM compared to *Dner* deficient M1 BMDM. **a)** List of enriched genes in WT M1 BMDM from the Notch1 pathway dataset of the GSEA analysis shown in Fig. 2C. **b)** IFNγ cytokine concentration in cell supernatants obtained from WT and *Dner* deficient BMDM treated with LPS (1µg/ml) for 24h and untreated (2 independent experiments, *n*=3). Two-way ANOVA, Tukey's multiple comparisons test, \**p*<0.05. Data shown mean values ± SD. **c)** Enriched genes in WT M1 BMDM from NFκB binding dataset (GO:0051059) from the GSEA analysis of the WT M1 vs *Dner* deficient M1 microarray data. **d)** Upstream regulator prediction based on 614 significantly (*p*<0.05) regulated genes between *Dner* deficient M1 vs WT M1 in our microarray analysis. The plot represents the top 9 inhibited regulators with the lowest activation z-scores.

**Supplementary Table 1.** Demographics and clinical characteristics of healthy and COPD transplant patients (Mean ± SEM). **FEV1:** Forced expiratory volume in the first second; **FVC:** Forced vital capacity; **ICS:** inhaled corticosteroids.

**Supplementary Table 2.** Primer sequences used for RT-PCR.
